# Supplementary material for: Genomic imbalances are involved in miR-30c and let-7a deregulation in ovarian tumors: implications for HMGA2 expression
Source: PubMed Central journal article supplement (PMC5400605; doi:10.18632/oncotarget.15795), 2017-03-01
Supplement: oncotarget-08-21554-s001.pdf [file oncotarget-08-21554-s001.pdf]

## **Genomic imbalances are involved in miR-30c and let-7a deregulation in ovarian tumors: implications for *HMGA2* expression**

### **Supplementary Materials**

**Supplementary Table 1: Overview of samples with genomic imbalances involving miR-30c and let-7a clusters.** See Supplementary\_Table\_1
